# Supplementary material for: In-hospital Mortality and Associated Factors among Adult Patients with Acute Heart Failure in a Tertiary Hospital, Harar, Eastern Ethiopia: A Cross-Sectional Study
Source: Research Square preprint supplement (doi:10.21203/rs.3.rs-2775153/v1), 2024-10-07
Supplement: Supplementary file 1 [file 790128a4b65a39a26e5f3574.docx]

## **Annex I: Data collecting tool**

1. Medical record number:_____________________________
2. Date: admitted (dd/mm/yyyy):___________ discharged(dd/mm/yyyy):_____________LOS____
3. Socio demographic information: - Age (years)__________ Gender: F M
4. Assessment (encircle ‘a’ or ‘b’): a. AHF b. ADHF
5. Vital signs at admission: BP______mmHg, PR_____beats/min, SpO2_____%
6. Has smoking history: Yes No 7. Number of admission _______

8. Imaging:

1. Chest X-ray findings: ………………………………………………………………………………………………………………………………………………………………………………………………………………
2. Electrocardiogram findings: ……………………………………………………………………………………...………………………………………………………………………………………………………………………
3. Echocardiography findings: Ejection Fraction=___________%, .……………………………………………………………………………………………..……………………………………………………………………………………………………………...
4. Ultrasound findings: ….…………………………………………………………………………………………...………………………………………………………………………………………………………………

9. Precipitating factors: …………………………………………………………………….....………...…………………………………………………………………………………………………………………………………

10. Clinical presentations (sign and symptoms) ……………………………………………………………………………………………………………………………………………………………………………………………………………………

11. other diagnoses than acute heart failure (Comorbidities): …………………………………………………………………………………..………………………………………………………………………………………………………………………

12. Treatment outcome (encircle ‘a’ or ‘b’)

- - 1. Discharged with improvement b. Died in hospital

**Laboratory values**

| **Date** | | | | | |  | | | |
| --- | --- | --- | --- | --- | --- | --- | --- | --- | --- |
| **Hematology** | | | | | | **Urinalysis** | | **Clinical chemistry** | |
| Test item | Result | | | | | Test item | Result | Test item | Result |
| CBC |  | | | | | SPGR |  | FBS/RBS |  |
| WBC |  | | | | | Albumin |  | Creatinine |  |
| Diff.count | N | L | M | E | B | Glucose |  | urea |  |
| RBC |  | | | | | Ketone |  | SGOT |  |
| HCT |  | | | | | Blood |  | SGPT |  |
| Hgb |  | | | | |  |  | ALP |  |
| MCV |  | | | | |  |  | Albumin |  |
| MCH |  | | | | |  |  | Uric Acid |  |
| MCHC |  | | | | |  |  | Cholesterol |  |
| RDW |  | | | | | **Microscopy** | | Triglyceride |  |
| Platelet count |  | | | | | WBC |  | HDL |  |
| ESR |  | | | | | RBC |  | LDL |  |
| PT |  | | | | | Casts |  | Na+ |  |
| PTT |  | | | | |  | | K+ |  |
| INR |  | | | | | CL- |  |
|  |  | | | | | Total Ca+ |  |
| Other tests : - | | | | | | | | | |
