# Supplementary material for: In-hospital Mortality and Associated Factors among Adult Patients with Acute Heart Failure in a Tertiary Hospital, Harar, Eastern Ethiopia: A Cross-Sectional Study
Source: Research Square preprint supplement (doi:10.21203/rs.3.rs-2775153/v1), 2024-10-07
Supplement: Supplementary file 2 [file aede1c84eb6357b2c842a942.docx]

## Information and voluntary consent of Medical Director of Haramaya University Hiwot Fana Comprehensive Specialized Hospital

My name is Chala Deriba. By now I am going to conduct a study at this hospital with other co-investigators. Therefore, we kindly request you to lend us your attention to explain about the study to be conducted at your health facility.

1. **The study title**

In-hospital mortality and Its Associated Factors among Adult Acute Heart Failure Patients at Haramaya University Hiwot Fana Comprehensive Specialized Hospital, Harar, Ethiopia

1. **Purpose of the study**

The findings of this study can be of paramount importance for the Hospital to plan intervention programs to improve treatment outcomes of acute heart failure thereby improve the quality of life and survival of heart failure patients. Moreover, this study aims to write a thesis as a partial requirement for the fulfillment of a Master’s Program in Clinical pharmacy for me (the investigator).

1. **procedure and duration**

Data collectors will collect pertinent data from randomly selected medical record cards of patients diagnosed with acute heart failure and treated at this hospital within the last five years from June 01, 2016, to May 31, 2021. Data will be collected from randomly selected patient medical record cards based on their medical record number and it may take 25 to 35 minutes to collect data from a single patient medical record card.

1. **Risk and benefit of the study**

The risk of collecting information in this way is very minimal, due to only data are recorded and cards are returned to their original place, but only taking few hours from patient card keepers. But the finding from this study will contribute to the body of knowledge that informs the hospital managers, health professionals, and decision-makers by providing data on clinical characteristics, treatment outcomes and factors affecting the treatment outcome of patients with acute heart failure

1. **Confidentiality**

The information collected in this study will be kept confidential. The patient names will not be indicated and medical record numbers will only be used for identification instead. Data collectors will be informed and trained to preserve information confidentiality; they will report the data only to the investigator and the collected data will only be used for this study.

1. **Rights**

Participation in this study is fully voluntary. A Medical director, as well as patients’ medical record card keepers, has the right to declare to participate and to withhold the data collection procedure in case any unethical act or misconduct may be committed. This will not label them for any loss of benefits to which they otherwise are entitled.

1. **Contact address**

If there is any question or inquiries at any time about the study or procedure please contact the investigator;

Chala Deriba: mobile phone; 0931257202

Email address: [chderiba@gmail.com](mailto:chderiba@gmail.com)

Haramaya University Institutional Health Research Review Ethics Committee

Office Phone number: 0254662011

P.O.Box 235, Harar, Ethiopia

1. **Declaration of informed voluntary consent**

I have read the information sheet and clearly understood the purpose, procedure of the research, confidentiality, and risk and benefits issue of this study. I have been allowed to ask questions about things that may have been unclear. I was informed that I have the right to declare to withhold the procedure of data collection in case any unethical act or misconduct may be committed at any time. Therefore, I declare the facility I am responsible, to participate in this study with my signature below.

Signature of medical director /CEO____________________________

Signature of data collectors__________________________________
