# Supplementary material for: In-hospital Mortality and Associated Factors among Adult Patients with Acute Heart Failure in a Tertiary Hospital, Harar, Eastern Ethiopia: A Cross-Sectional Study
Source: Research Square preprint supplement (doi:10.21203/rs.3.rs-2775153/v1), 2024-10-07
Supplement: Supplementary file 3 [file d8c3584813e8b381b49217e8.docx]

**STROBE Statement-checklist of items that should be included in reports of observational studies**

|  | **Item No.** | **Recommendation** | **Page** | |
| --- | --- | --- | --- | --- |
| **Title and abstract** | 1 | (*a*) Indicate the study’s design with a commonly used term in the title or the abstract | 1 | |
|  |  | (*b*) Provide in the abstract an informative and balanced summary of what was done and what was found. | 2 | |
| **Introduction** |  |  |  | |
| Background/rationale | 2 | Explain the scientific background and rationale for the investigation being reported | 3 | |
| Objectives | 3 | State specific objectives, including any prespecified hypotheses | 4 | |
| **Methods** |  |  |  | |
| Study design | 4 | Present key elements of study design early in the paper | 4 | |
| Setting | 5 | Describe the setting, locations, and relevant dates, including periods of recruitment,  exposure, follow-up, and data collection | 4 | |
| Participants | 6 | (*a*) *Cohort study*: Give the eligibility criteria, and the sources and methods of selection of participants. Describe methods of follow-up | 4-6 |
|  |  | (*b*) *Cohort study*: For matched studies, give matching criteria and number of exposed and unexposed  *Case-control study*: For matched studies, give matching criteria and the number of controls per case | N/A | |
| Variables | 7 | Clearly define all outcomes, exposures, predictors, potential confounders, and effect modifiers. Give diagnostic criteria, if applicable. | 6-7 | |
| Data sources/ measurement | 8* | For each variable of interest, give sources of data and details of methods of assessment (measurement). Describe comparability of assessment methods if there is more than one group. | 6 | |
| Bias | 9 | Describe any efforts to address potential sources of bias | 6 | |
| Study size | 10 | Explain how the study size was arrived at | 6 | |
| Quantitative variables | 11 | Explain how quantitative variables were handled in the analyses. If applicable,  describe which groupings were chosen and why | 6-7 | |
| Statistical methods | 12 | (*a*) Describe all statistical methods, including those used to control for confounding | 7 | |
|  |  | (*b*) Describe any methods used to examine subgroups and interactions | 8 | |
|  |  | (*c*) Explain how missing data were addressed | 8 | |
|  |  | (*d*) *Cohort study*—If applicable, explain how loss to follow-up was addressed  *Case-control study*—If applicable, explain how matching of cases and controls was addressed. | N/A  N/A | |
|  |  | (*e*) Describe any sensitivity analyses | N/A | |
| Continued on next page |  |  |  | |

| **Results** |  |  | **Page** |
| --- | --- | --- | --- |
| Descriptive data | 14* | (a) Give characteristics of study participants (e.g. demographic, clinical, social) and information on exposures and potential confounders | 9/Table 1 |
|  |  | (b) Indicate number of participants with missing data for each variable of interest | 9 |
|  |  | (c) *Cohort study*:- Summarized follow-up time (e.g., average and total amount) | N/A |
| Outcome data | 15* | *Cohort study*:- Report numbers of outcome events or summary measures over time | 9-12 |
|  |  | *Case-control study:-* Report numbers in each exposure category, or summary measures of exposure | N/A |
|  |  | *Cross-sectional study:-*Report numbers of outcome events or summary measures |  |
| Main results | 16 | (a) Give unadjusted estimates and, if applicable, confounder-adjusted estimates and their precision (eg, 95% confidence interval). Make clear which confounders were adjusted for and why they were included | 11-12 |
|  |  | (b) Report category boundaries when continuous variables were categorized | N/A |
|  |  | (c) If relevant, consider translating estimates of relative risk into absolute risk for a meaningful time period | 11-12/Table 4 |
| Other analyses | 17 | Report other analyses done; e.g. analyses of subgroups and interactions, and sensitivity analyses | Reports of each wards in tables |
| **Discussion** |  |  |  |
| Key results | 18 | summarize key results with reference to study objectives | 10-12 |
| Interpretation | 19 | Give a cautious overall interpretation of results considering objectives, limitations, multiplicity of analyses, results from similar studies, and other relevant evidence | 13-14 |
| Generalizability | 20 | Discuss the generalizability (external validity) of the study results | 14 |
| Limitations | 21 | Discuss limitations of the study, taking into account sources of potential bias or imprecision.  Discuss both direction and magnitude of any potential bias | 14 |
| **Other information** |  |  |  |
| Funding | 22 | Give the source of funding and the role of the funders for the present study and, if applicable, for the original study on which the present article is based. | 16 |

*Give information separately for cases and controls in case-control studies and, if applicable, for exposed and unexposed groups in cohort and cross-sectional studies.

**Note:** An Explanation and Elaboration article discusses each checklist item and gives methodological background and published examples of transparent reporting. Information on the STROBE Initiative is available at [www.strobe-statement.org.](http://www.strobe-statement.org/)
